# Supplementary material for: Comparison of diverse resistive switching characteristics and demonstration of transitions among them in Al-incorporated HfO2-based resistive switching memory for neuromorphic applications
Source: Royal Society of Chemistry journal article supplement (doi:10.1039/d0ra06389d), 2020-01-01
Supplement: d0ra06389d1.pdf [file d0ra06389d1.pdf]

## Electronic Supplementary Materials (ESI) for PCCP

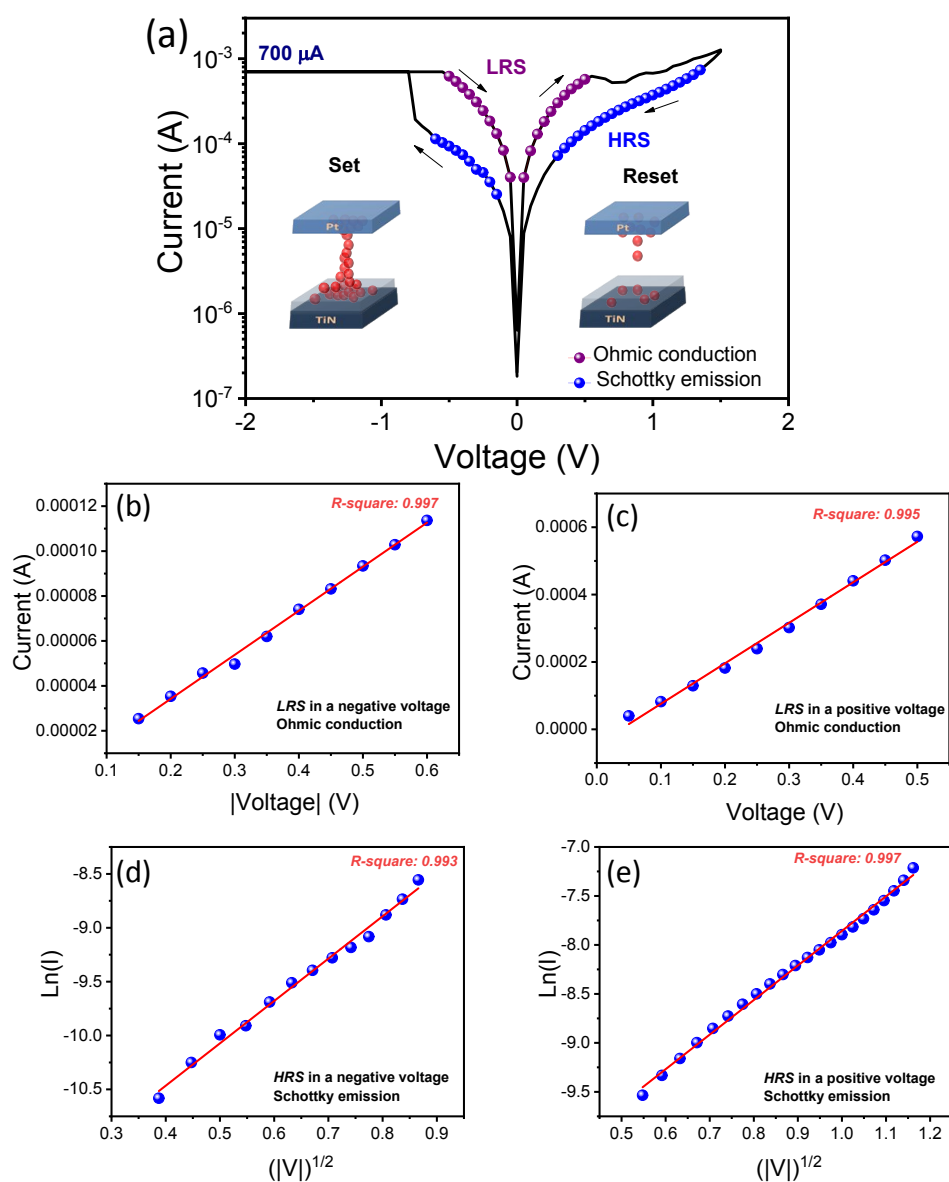

**Fig. S1** Fitting results of Pt/HfAlO<sub>x</sub>/TiN device in type 1 (a): Ohmic conduction in (b) a negative region and (c) a positive region for LRS. Ln(I) versus V<sup>1/2</sup> fitting for Schottky emission in (d) a negative region and (e) a positive region for HRS.

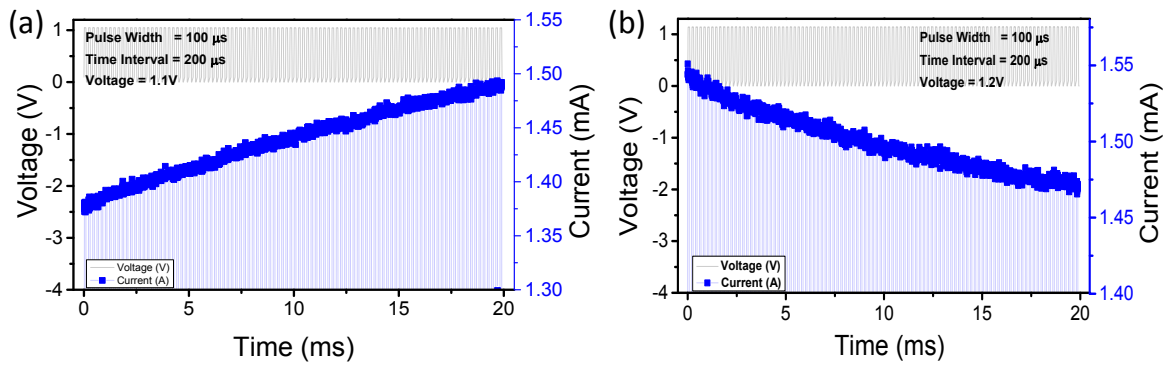

Fig. S2 Gradual set and reset by pulse train in CRS mode: (a) set (1.1 V) and (b) reset (1.2 V) by voltage amplitude.

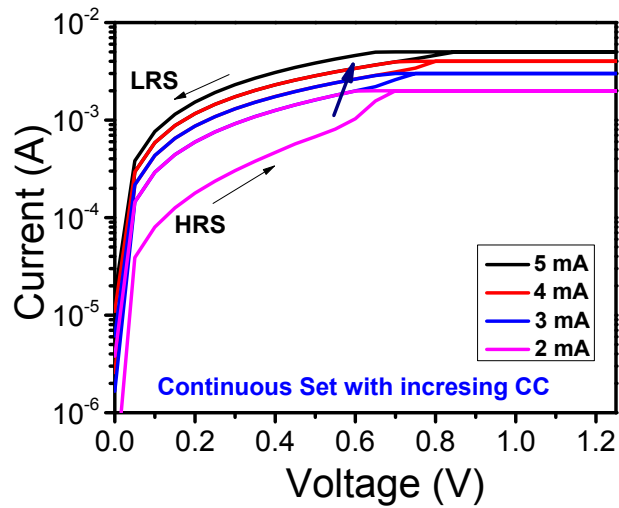

Fig. S3 Gradual set and reset by pulse train in CRS mode: (a) set (1.1 V) and (b) reset (1.2 V) by voltage amplitude.

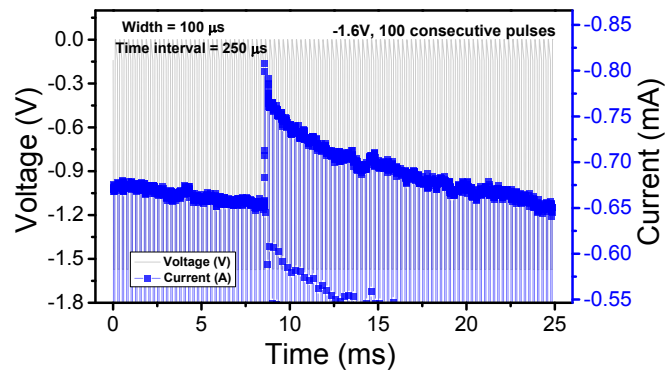

Fig. S4 Short-term effect (current decay after abrupt jump) by pulse train.

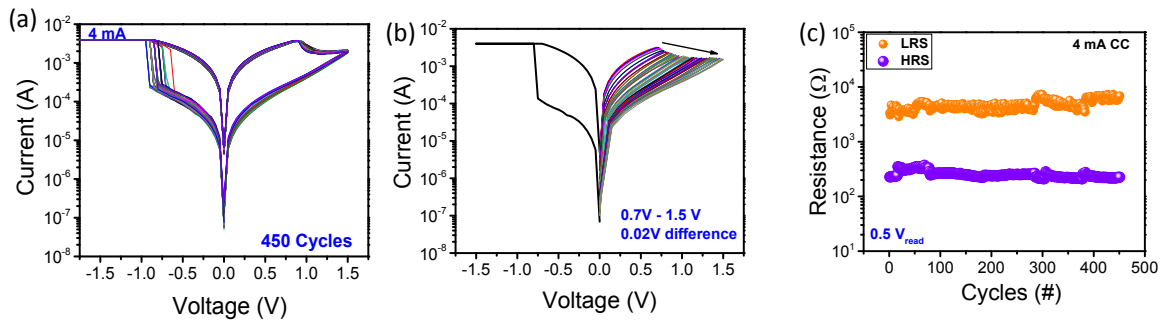

**Fig. S5** BRS operation at CC of 4 mA: (a) Typical I-V curves, (b) MLC by reset stop voltage control, (c) endurance up to 450 cycles.

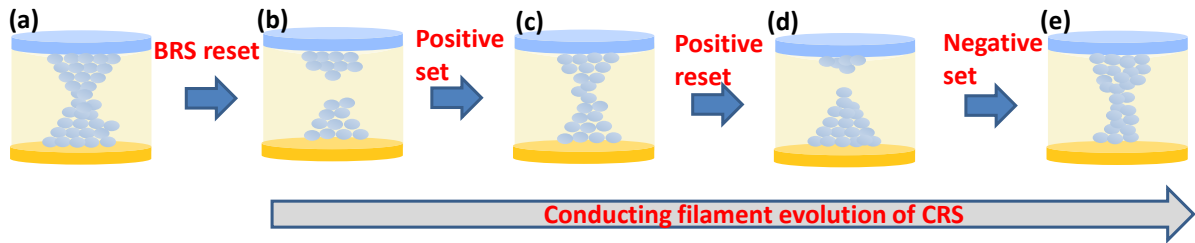

**Fig. S6** Schematic of possible filament evolution for transition from BRS to CRS: (a) LRS and (b) HRS after reset in BRS mode. (c) Set and (d) subsequent reset in a positive bias in CRS mode. (e) Set in a negative bias in CRS mode.
